# Supplementary material for: Skeleton Synthesis of a Plant-Derived Radioprotective Alkaloid Born to Produce a Novel Fused Heterocycle
Source: MDPI journal article supplement (doi:10.3390/molecules28093829), 2023-04-30

---

## Supplementary Material

- 1     Supplementary Figure S1.  $^1\text{H}$ -NMR spectrum of 7 in  $\text{DMSO-}d_6$
- 2     Supplementary Figure S2.  $^{13}\text{C}$ -NMR spectrum of 7 in  $\text{DMSO-}d_6$
- 3     Supplementary Figure S3. HR-ESI-MS spectrum of 7
- 4     Supplementary Figure S4.  $^1\text{H}$ -NMR spectrum of 9 in  $\text{DMSO-}d_6$
- 5     Supplementary Figure S5.  $^{13}\text{C}$ -NMR spectrum of 9 in  $\text{DMSO-}d_6$
- 6     Supplementary Figure S6. HR-ESI-MS spectrum of 9
- 7     Supplementary Figure S7.  $^1\text{H}$ -NMR spectrum of 11 in  $\text{DMSO-}d_6$
- 8     Supplementary Figure S8.  $^{13}\text{C}$ -NMR spectrum of 11 in  $\text{DMSO-}d_6$
- 9     Supplementary Figure S9. HR-ESI-MS spectrum of 11
- 10    Supplementary Figure S10.  $^1\text{H}$ -NMR spectrum of 12 in  $\text{DMSO-}d_6$
- 11    Supplementary Figure S11.  $^{13}\text{C}$ -NMR spectrum of 12 in  $\text{DMSO-}d_6$
- 12    Supplementary Figure S12. HR-ESI-MS spectrum of 12
- 13    Supplementary Figure S13.  $^1\text{H}$ -NMR spectrum of 13 in  $\text{DMSO-}d_6$
- 14    Supplementary Figure S14.  $^{13}\text{C}$ -NMR spectrum of 13 in  $\text{DMSO-}d_6$
- 15    Supplementary Figure S15. HR-ESI-MS spectrum of 13
- 16    Supplementary Figure S16.  $^1\text{H}$ -NMR spectrum of 14 in  $\text{DMSO-}d_6$
- 17    Supplementary Figure S17.  $^{13}\text{C}$ -NMR spectrum of 14 in  $\text{DMSO-}d_6$
- 18    Supplementary Figure S18 HR-ESI-MS spectrum of 14
- 19    Supplementary Figure S19.  $^1\text{H}$ -NMR spectrum of 15 in  $\text{DMSO-}d_6$
- 20    Supplementary Figure S20.  $^{13}\text{C}$ -NMR spectrum of 15 in  $\text{DMSO-}d_6$
- 21    Supplementary Figure S21. HR-ESI-MS spectrum of 15
- 22    Supplementary Figure S22.  $^1\text{H}$ -NMR spectrum of 1 in  $\text{DMSO-}d_6$
- 23    Supplementary Figure S23.  $^{13}\text{C}$ -NMR spectrum of 1 in  $\text{DMSO-}d_6$
- 24    Supplementary Figure S24. HR-ESI-MS spectrum of 1
- 25    Supplementary Figure S25.  $^1\text{H}$ - $^1\text{H}$  COSY spectrum of 1
- 26    Supplementary Figure S26. HSQC spectrum of 1
- 27    Supplementary Figure S27. HMBC spectrum of 1

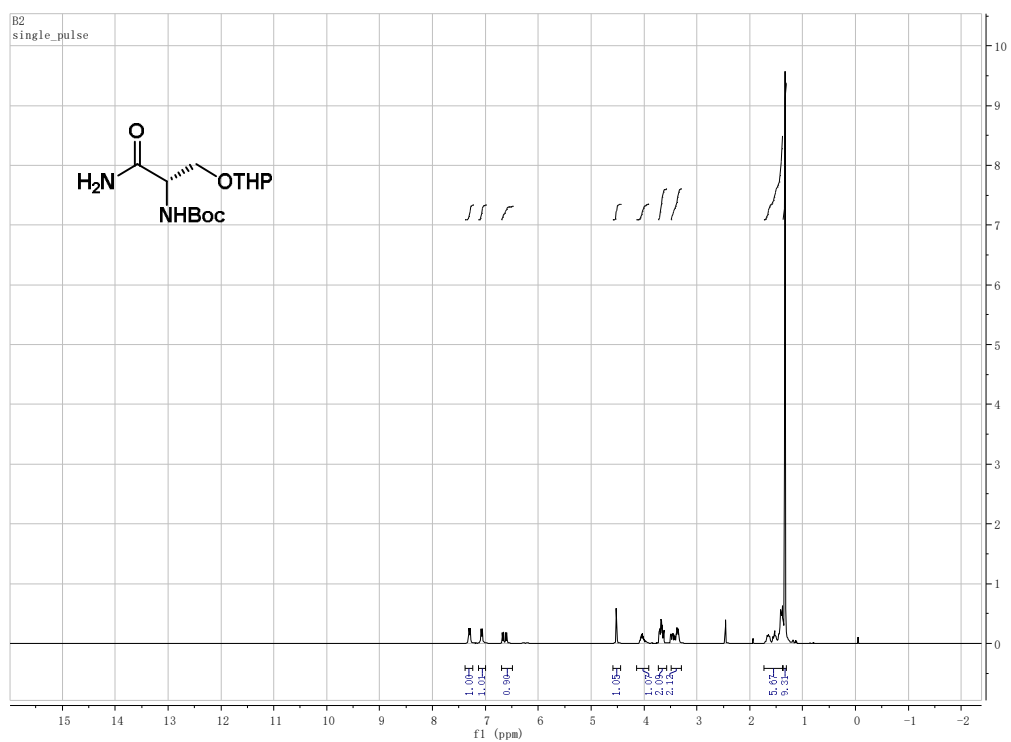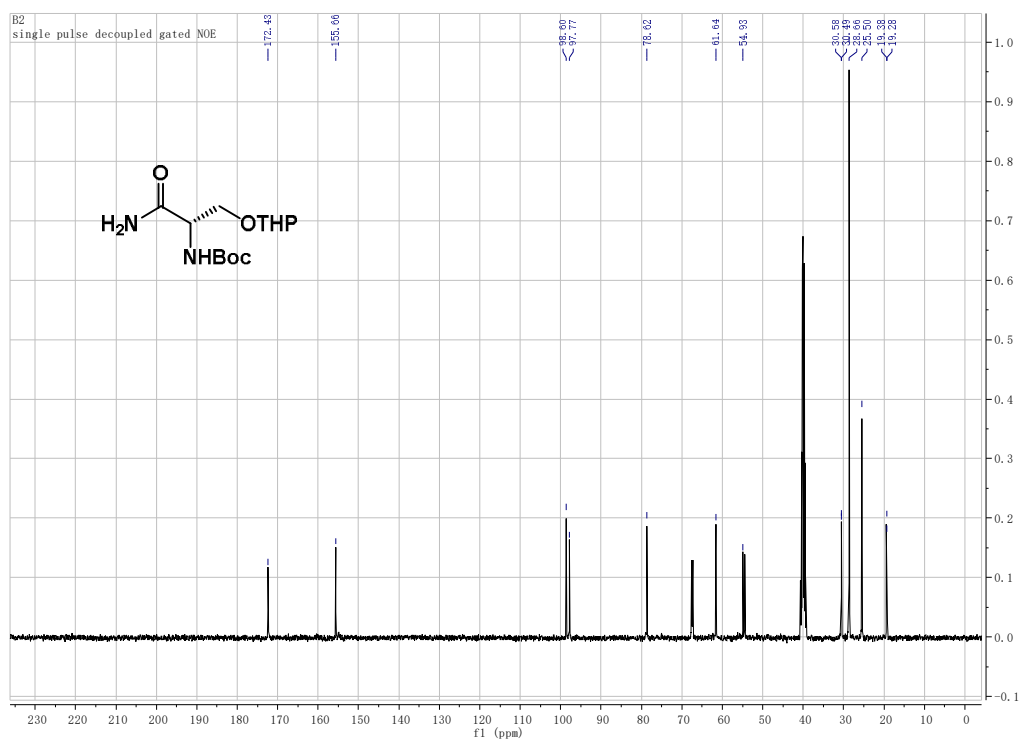

## Qualitative Analysis Report

|                        |            |               |                             |
|------------------------|------------|---------------|-----------------------------|
| Data Filename          | 1980.d     | Sample Name   | L-288                       |
| Instrument Name        | TOF G6230A | Acquired Time | 2023-04-06                  |
| Acq Method             | YCLM       | Acquired SW   | 6200 series TOF/6500 series |
| IRM Calibration Status | Success    |               |                             |
| User Chromatograms     |            |               |                             |

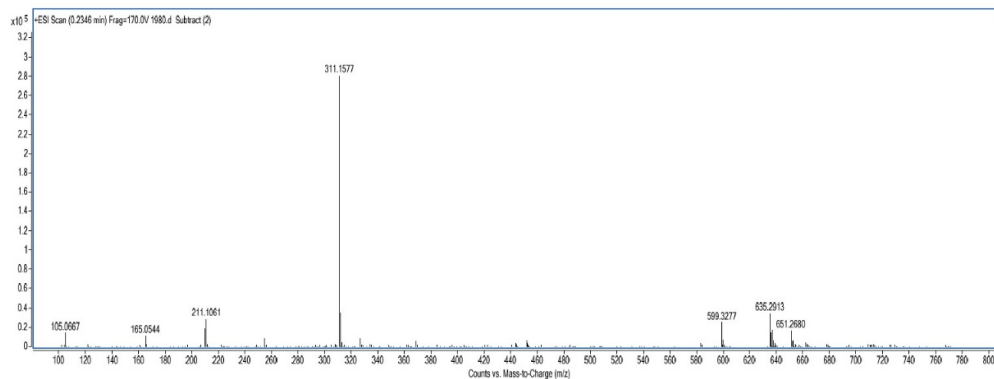

Supplementary Figure S3 HR-ESI-MS spectrum of 7

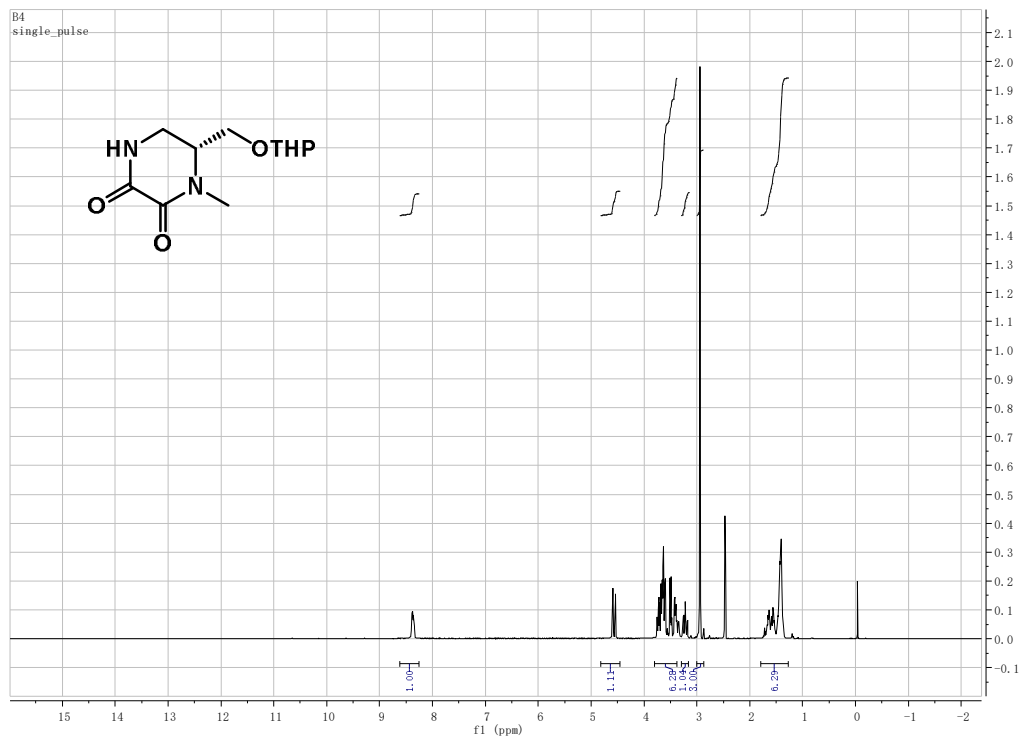

Supplementary Figure S4 <sup>1</sup>H-NMR spectrum of 9

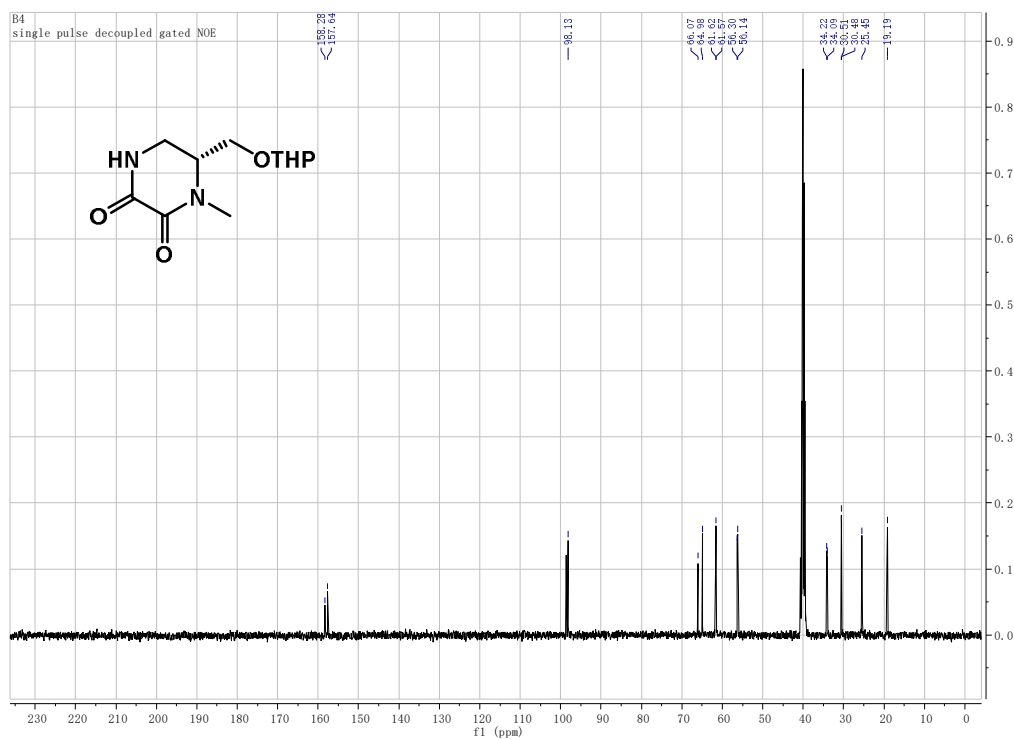

**Supplementary Figure S5**  $^{13}\text{C}$ -NMR spectrum of **9**

**Supplementary Figure S6** HR-ESI-MS spectrum of **9**

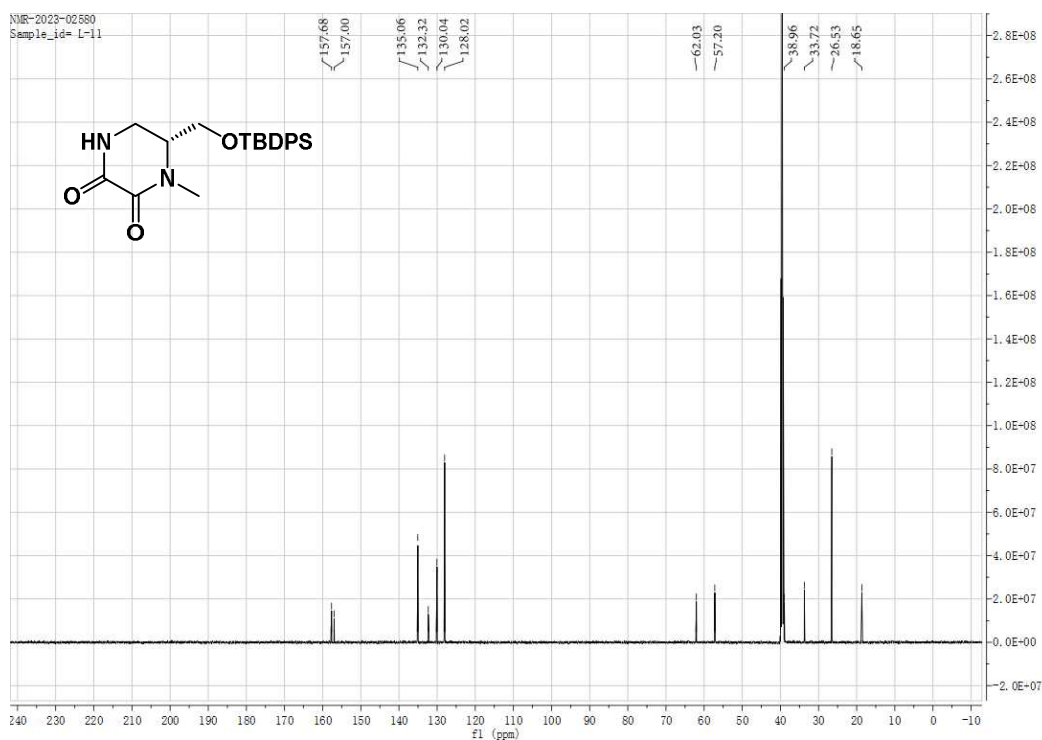

Supplementary Figure S8  $^{13}\text{C}$ -NMR spectrum of 11

### Qualitative Analysis Report

|                        |            |               |                             |
|------------------------|------------|---------------|-----------------------------|
| Data Filename          | 1977.d     | Sample Name   | L-396                       |
| Instrument Name        | TOF G6230A | Acquired Time | 2023-04-06                  |
| Acq Method             | YCLM       | Acquired SW   | 6200 series TOF/6500 series |
| IRM Calibration Status | Success    |               |                             |
| User Chromatograms     |            |               |                             |

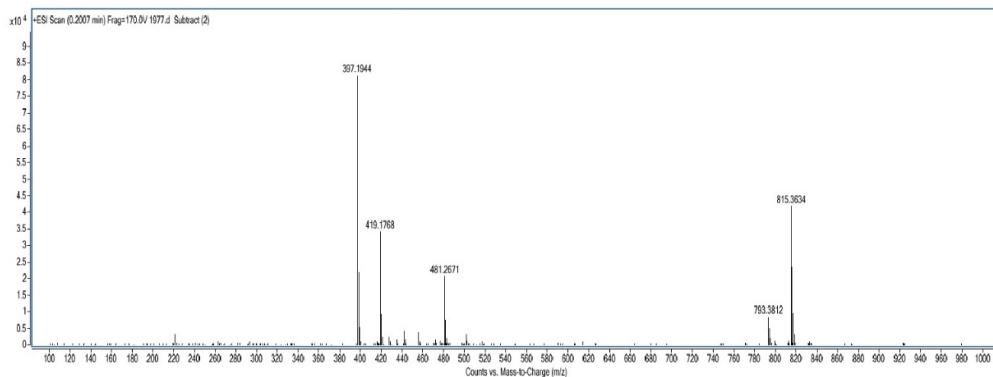

Supplementary Figure S9 HR-ESI-MS spectrum of 11

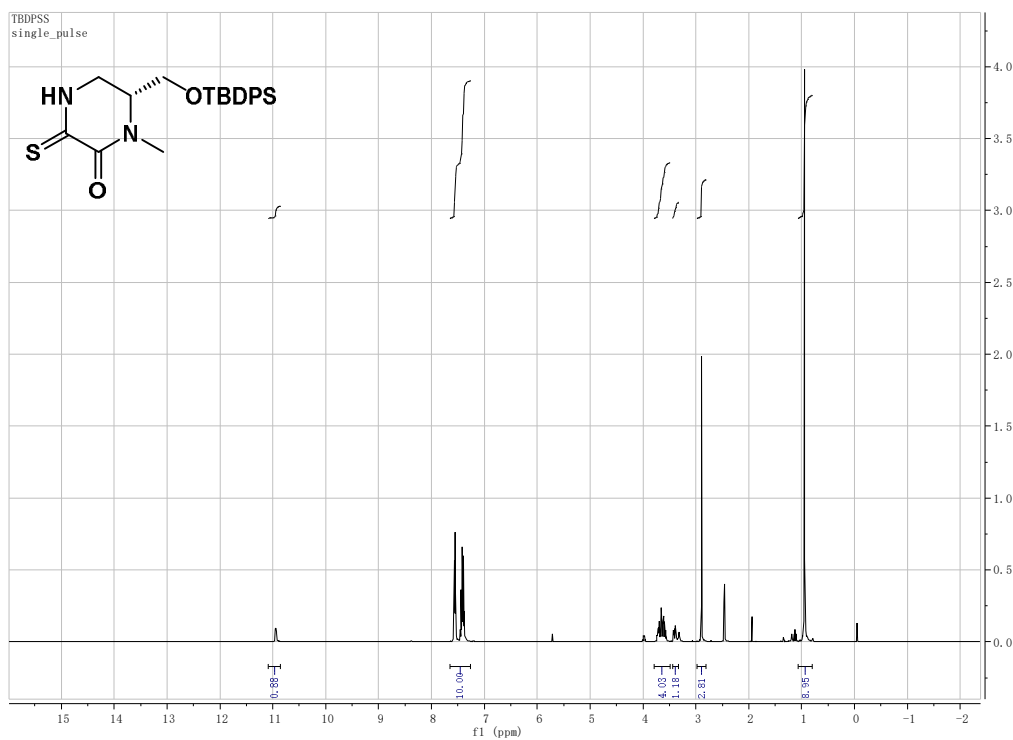

Supplementary Figure S10  $^1\text{H}$ -NMR spectrum of 12

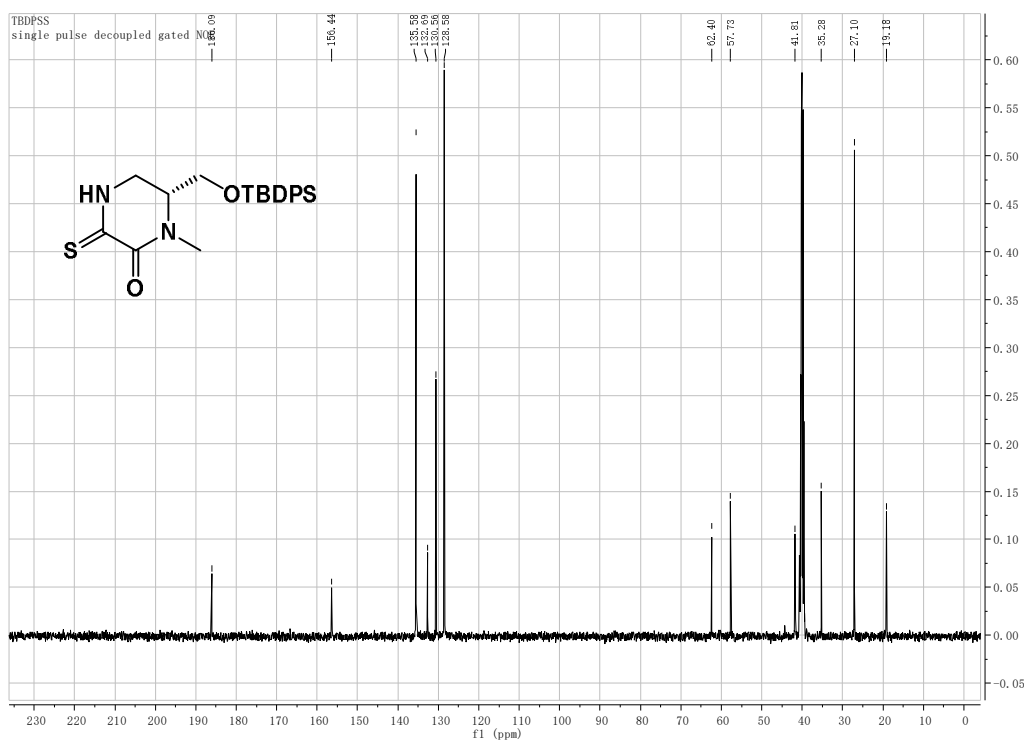

Supplementary Figure S11  $^{13}\text{C}$ -NMR spectrum of 12

|                        |            |               |                             |
|------------------------|------------|---------------|-----------------------------|
| Data Filename          | 1978.d     | Sample Name   | L-412                       |
| Instrument Name        | TOF G6230A | Acquired Time | 2023-04-06                  |
| Acq Method             | YCL.M      | Acquired SW   | 6200 series TOF/6500 series |
| IRM Calibration Status | Success    |               |                             |
| User Chromatograms     |            |               |                             |

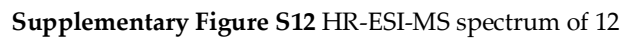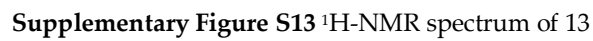

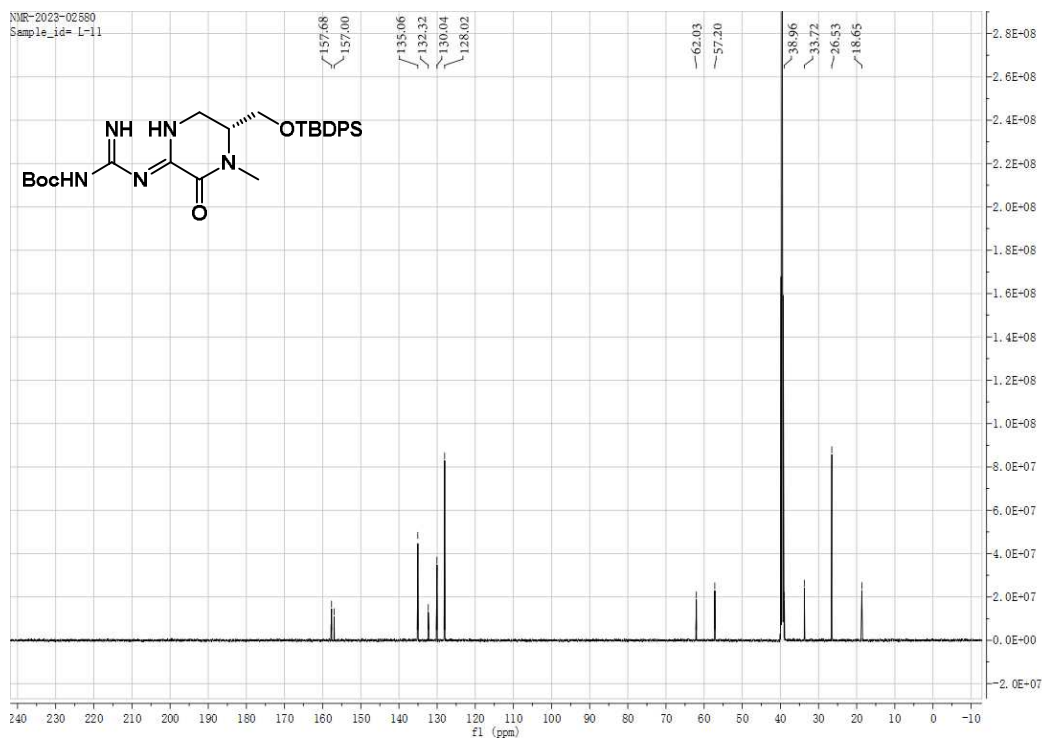

Supplementary Figure S14  $^{13}\text{C}$ -NMR spectrum of 13

#### Qualitative Analysis Report

|                        |            |               |                             |
|------------------------|------------|---------------|-----------------------------|
| Data Filename          | 2025.d     | Sample Name   | L-537                       |
| Instrument Name        | TOF G6230A | Acquired Time | 2023-04-07                  |
| Acq Method             | YCLM       | Acquired SW   | 6200 series TOF/6500 series |
| IRM Calibration Status | Success    |               |                             |
| User Chromatograms     |            |               |                             |

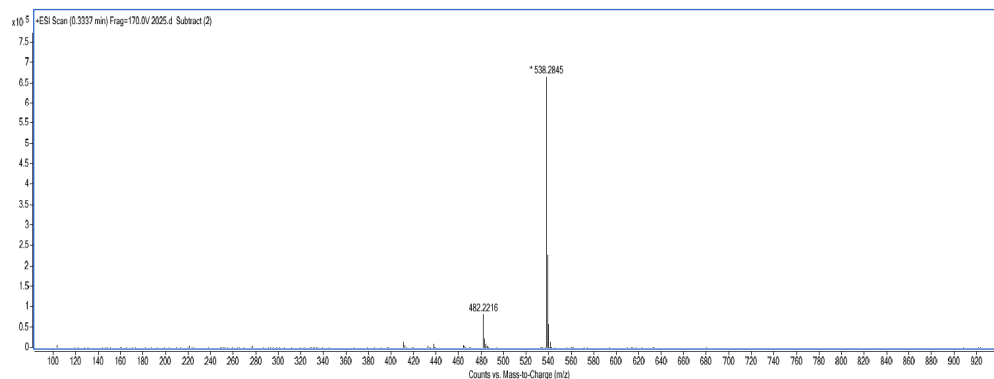

Supplementary Figure S15 HR-ESI-MS spectrum of 13



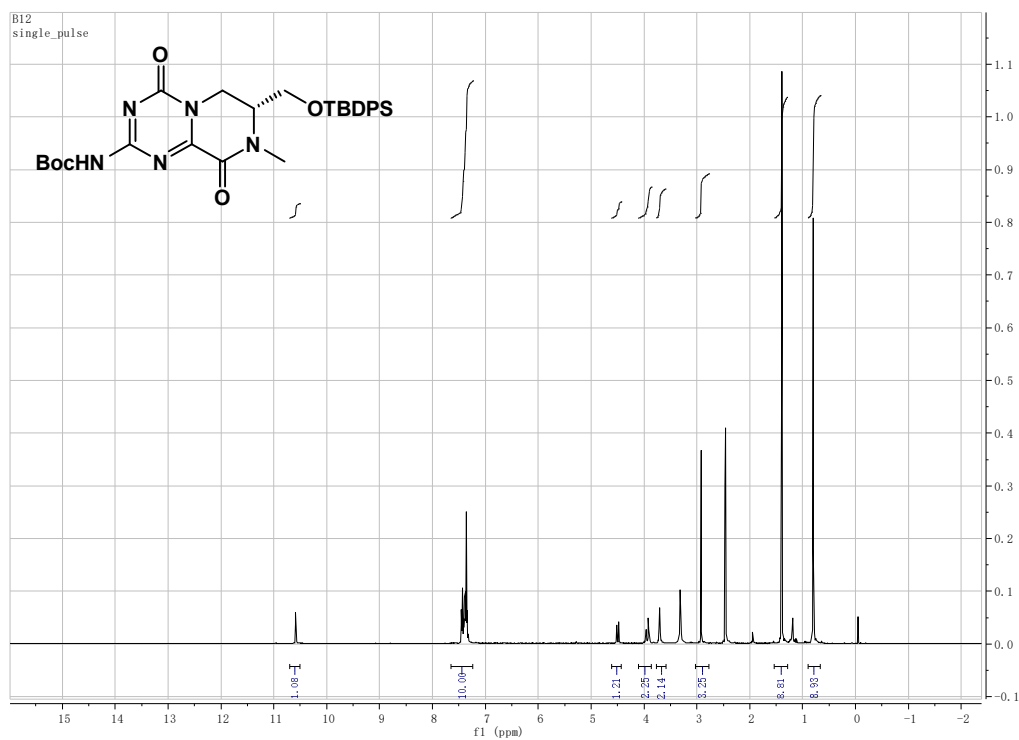

Supplementary Figure S16  $^1\text{H}$ -NMR spectrum of 14

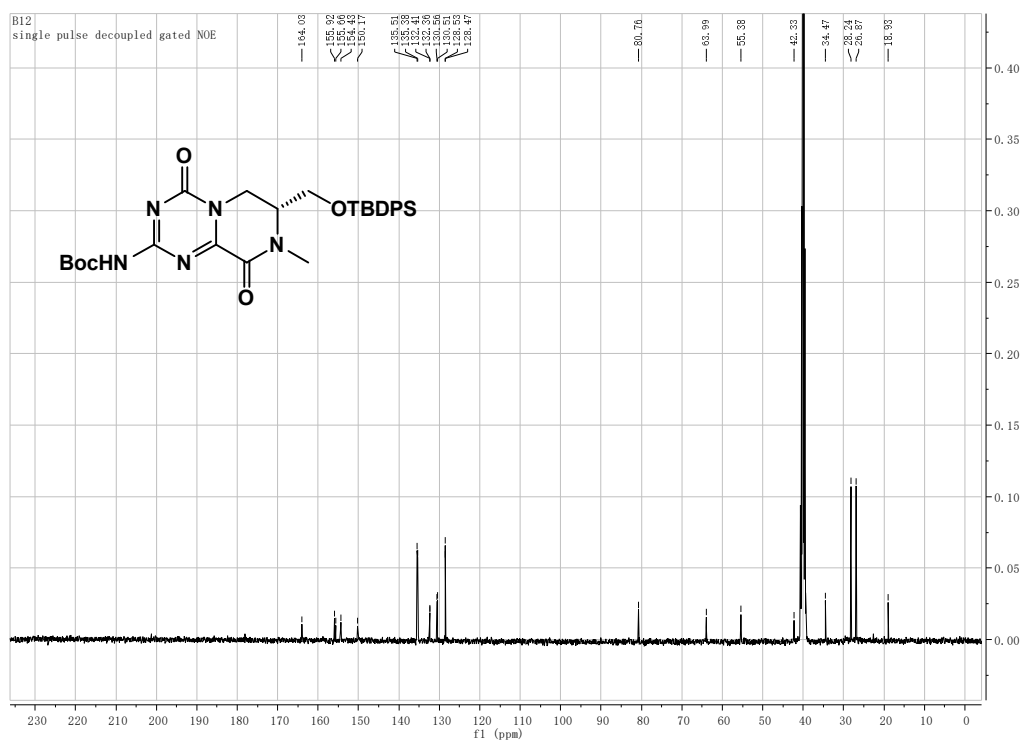

Supplementary Figure S17  $^{13}\text{C}$ -NMR spectrum of 14

## Qualitative Analysis Report

|                        |            |               |                             |
|------------------------|------------|---------------|-----------------------------|
| Data Filename          | 2026.d     | Sample Name   | L-563                       |
| Instrument Name        | TOF G6230A | Acquired Time | 2023-04-07                  |
| Acq Method             | YCLM       | Acquired SW   | 6200 series TOF/6500 series |
| IRM Calibration Status | Success    |               |                             |
| User Chromatograms     |            |               |                             |

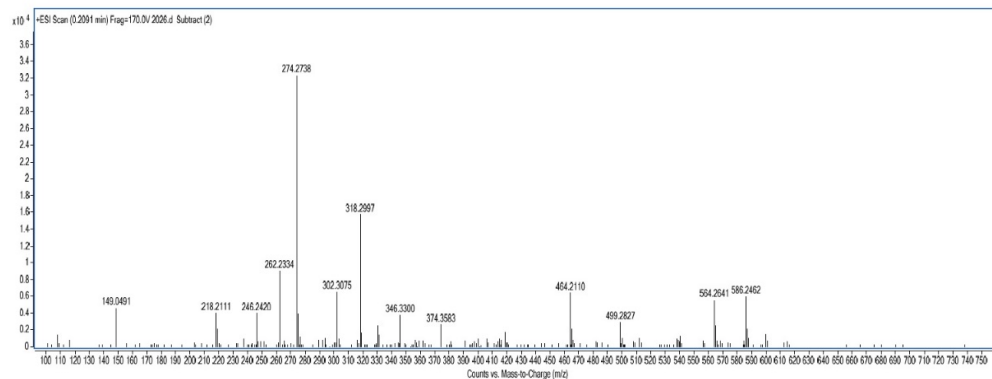

**Supplementary Figure S18** HR-ESI-MS spectrum of 14

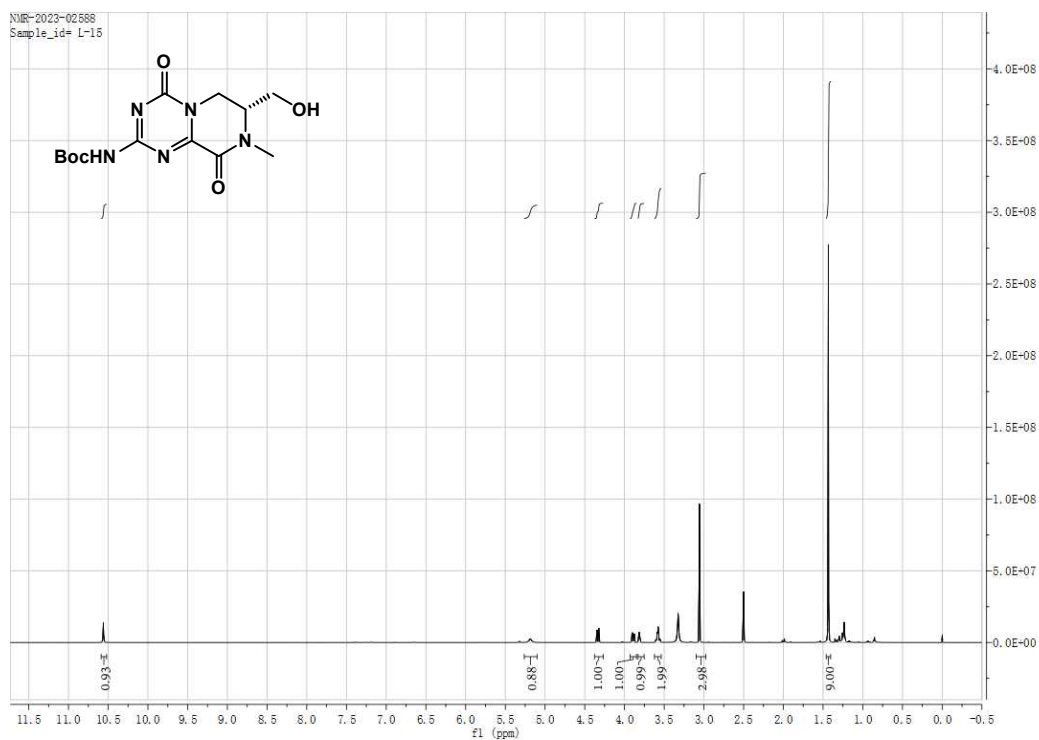

**Supplementary Figure S19** <sup>1</sup>H-NMR spectrum of 15

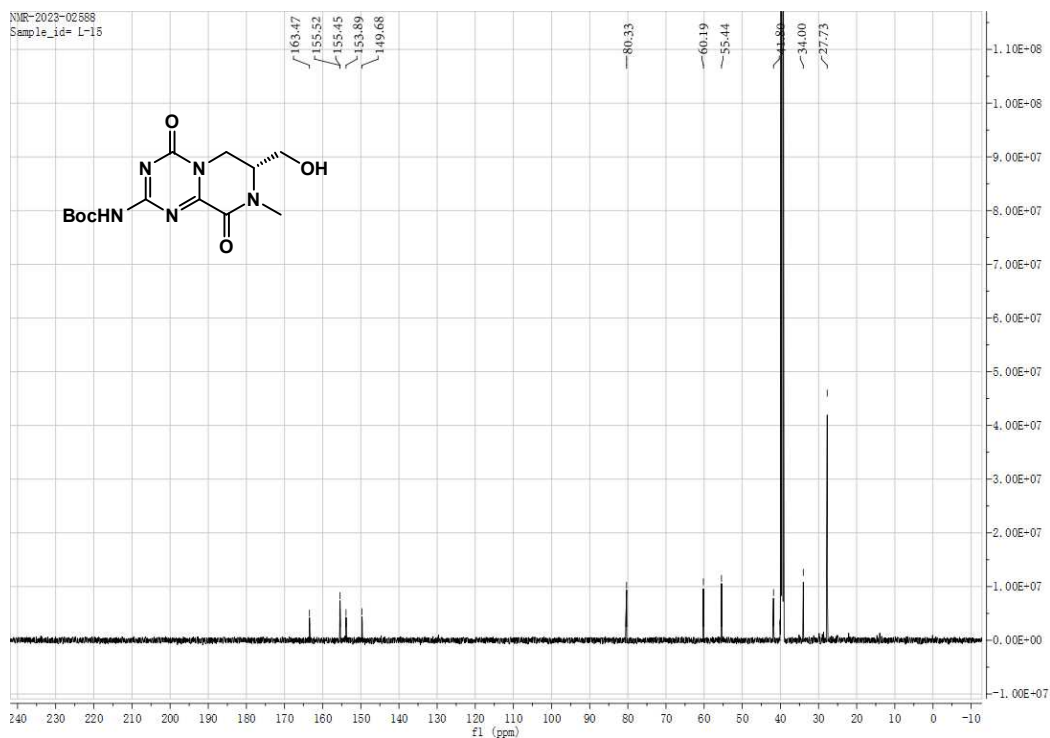

Supplementary Figure S20  $^{13}\text{C}$ -NMR spectrum of 15

### Qualitative Analysis Report

|                        |            |               |                             |
|------------------------|------------|---------------|-----------------------------|
| Data Filename          | 1979.d     | Sample Name   | L-325                       |
| Instrument Name        | TOF G6230A | Acquired Time | 2023-04-06                  |
| Acq Method             | YCLM       | Acquired SW   | 6200 series TOF/6500 series |
| IRM Calibration Status | Success    |               |                             |
| User Chromatograms     |            |               |                             |

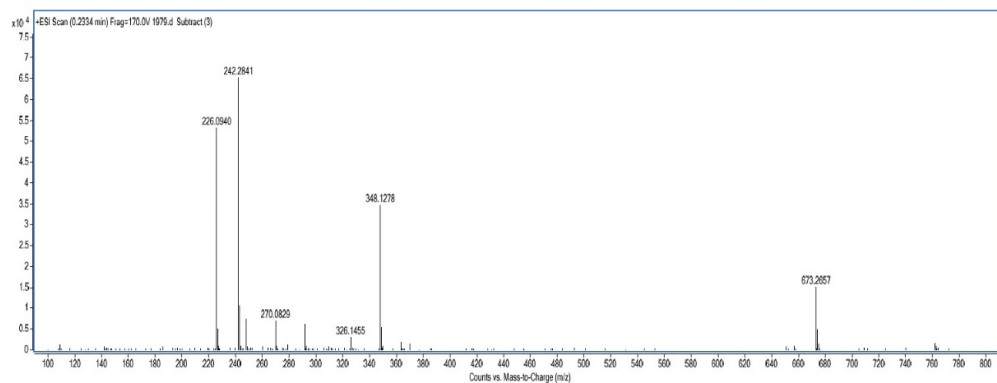

Supplementary Figure S21 HR-ESI-MS spectrum of 15

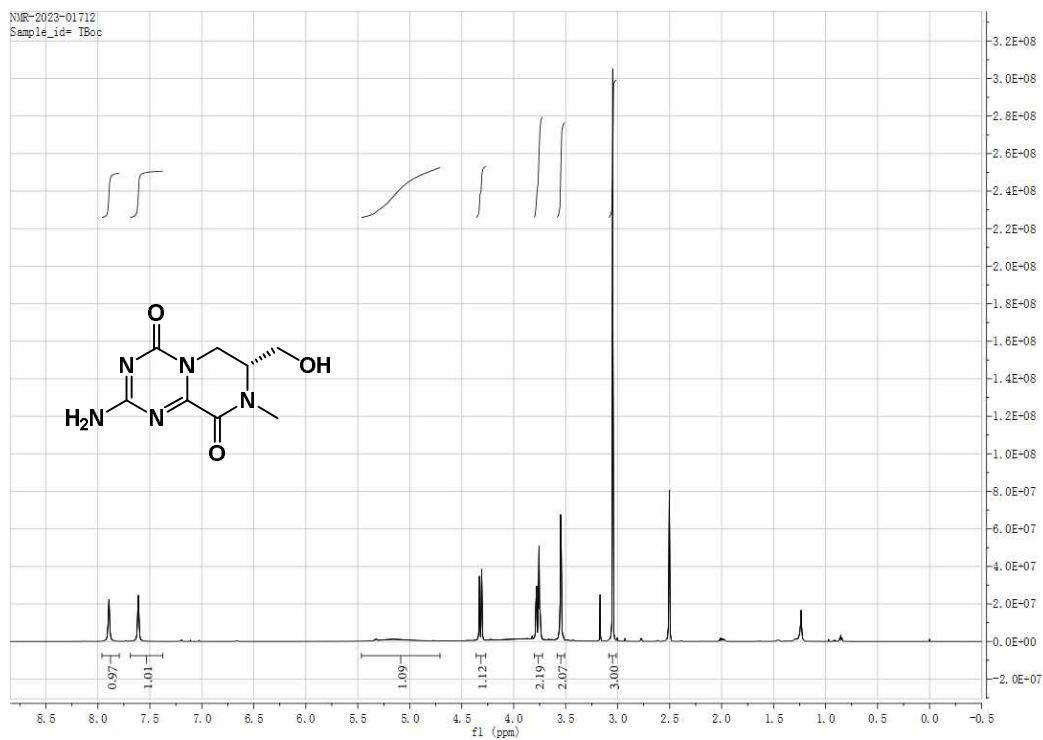

Supplementary Figure S22 <sup>1</sup>H-NMR spectrum of 1

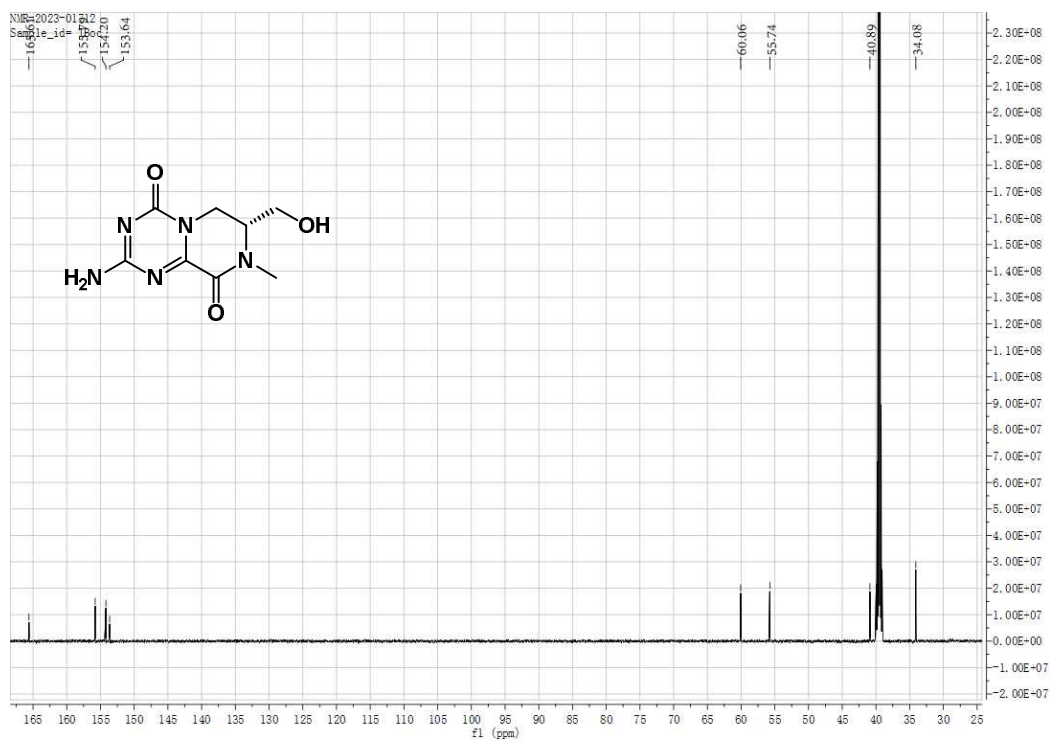

Supplementary Figure S23 <sup>13</sup>C-NMR spectrum of 1

## Qualitative Analysis Report

|                        |            |               |                             |
|------------------------|------------|---------------|-----------------------------|
| Data Filename          | 1624.d     | Sample Name   | TBoc                        |
| Instrument Name        | TOF G6230A | Acquired Time | 2023-03-23                  |
| Acq Method             | YCLM       | Acquired SW   | 6200 series TOF/6500 series |
| IRM Calibration Status | Success    |               |                             |
| User Chromatograms     |            |               |                             |

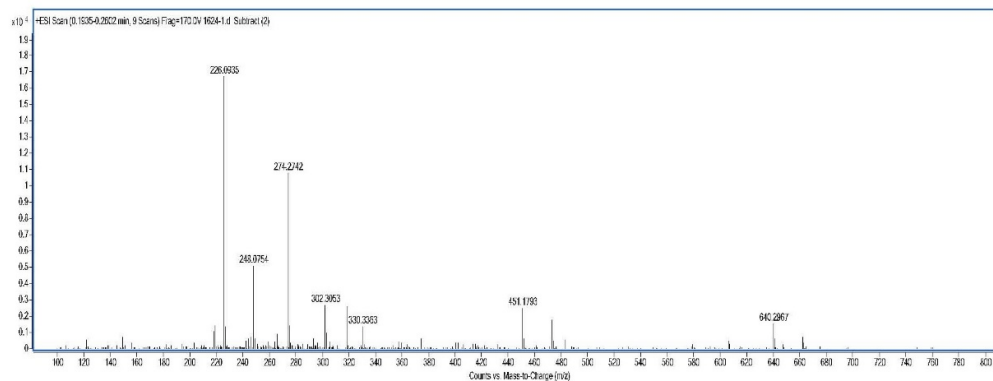

Supplementary Figure S24 HR-ESI-MS spectrum of 1

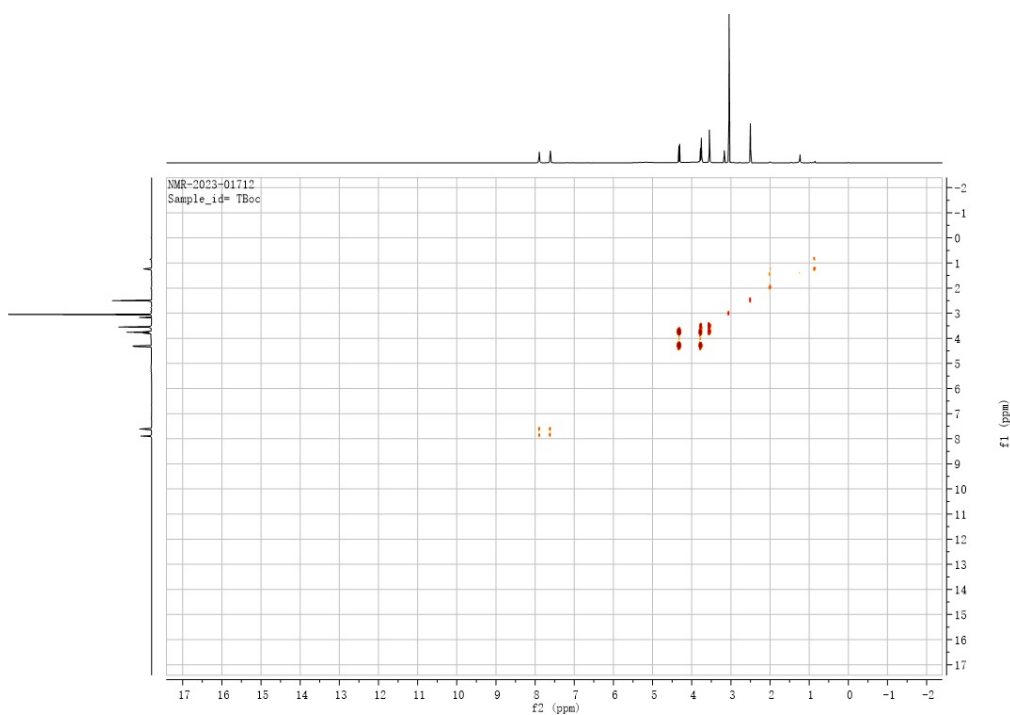

Supplementary Figure S25 <sup>1</sup>H-<sup>1</sup>H COSY spectrum of 1

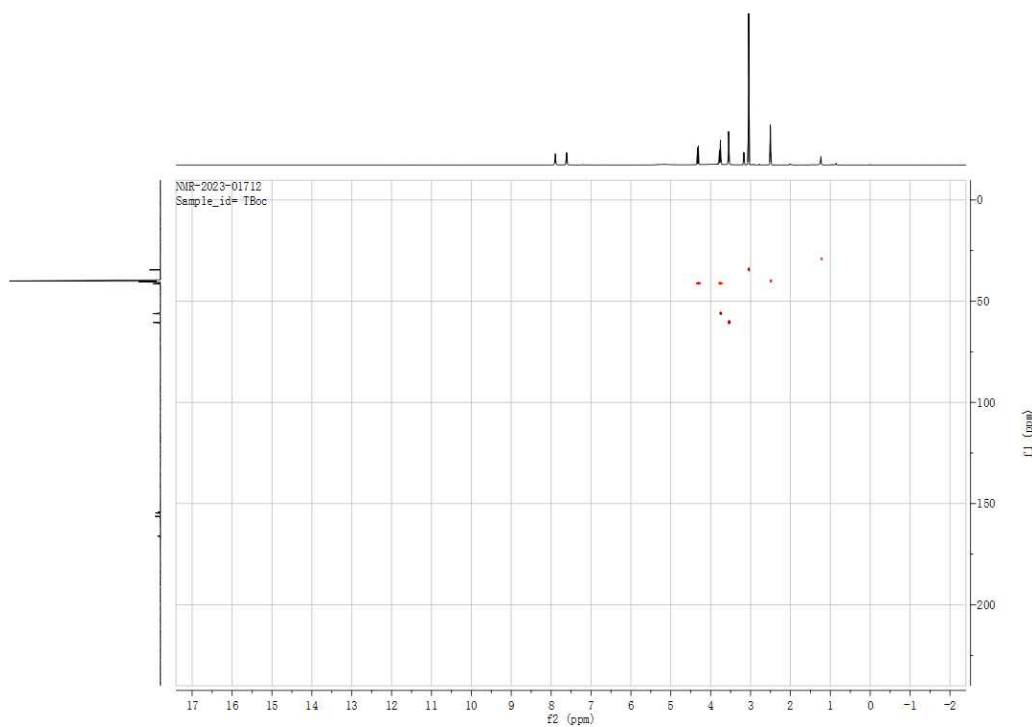

Supplementary Figure S26 HSQC spectrum of 1

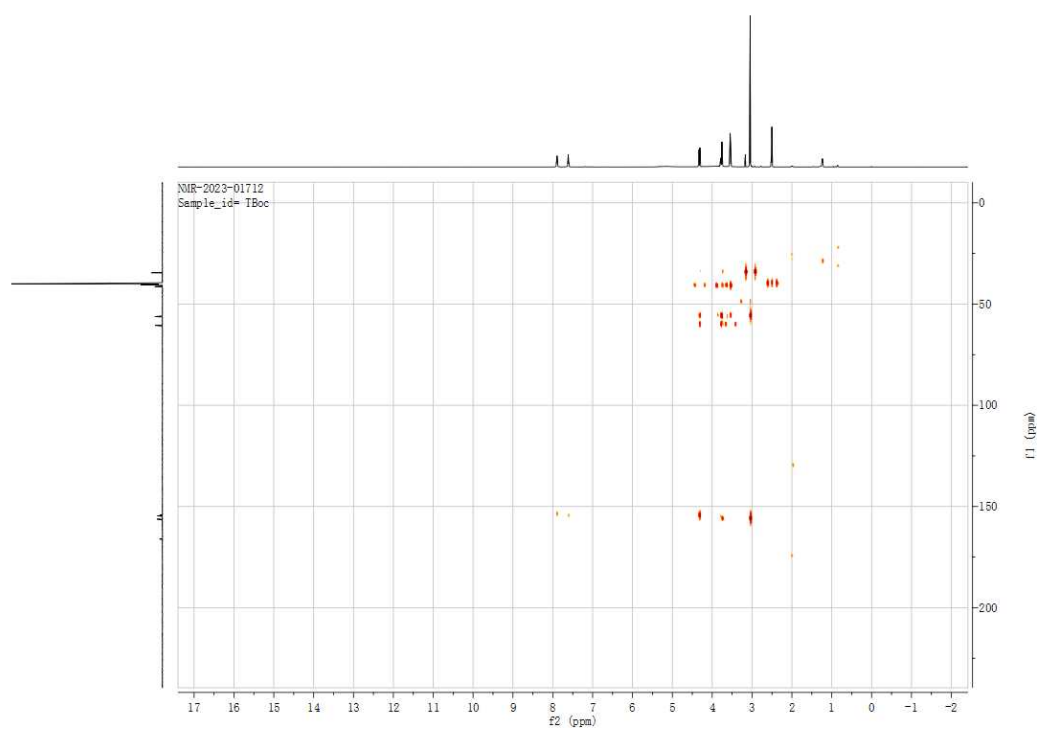

Supplementary Figure S27 HMBC spectrum of 1

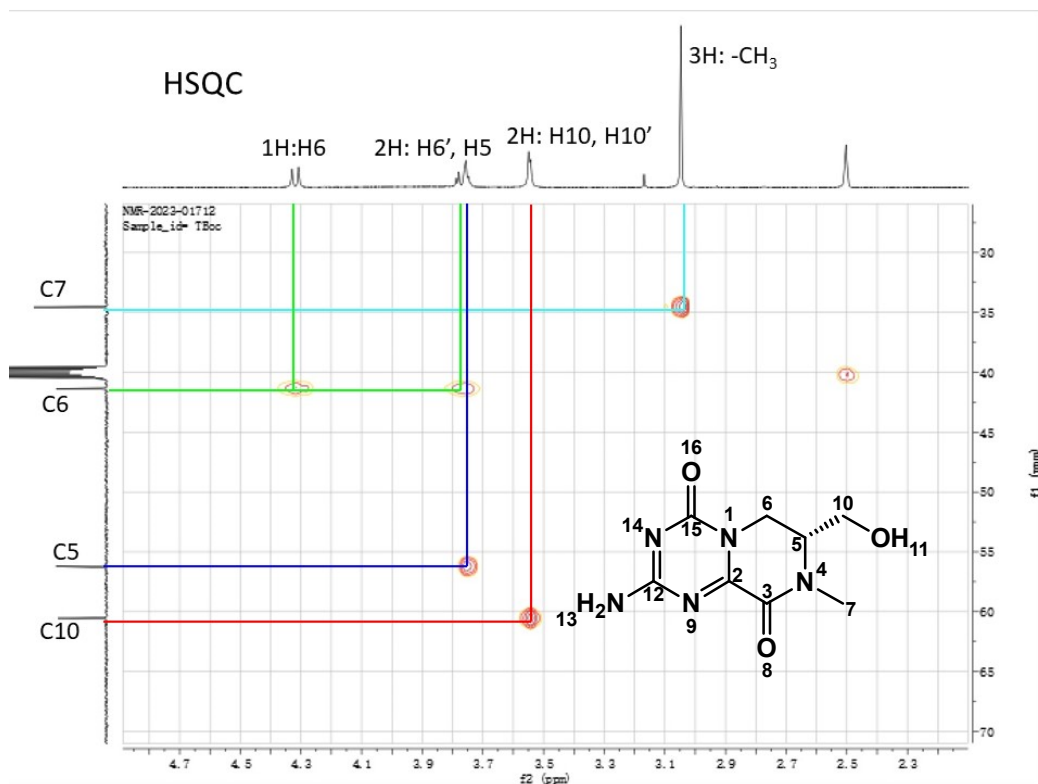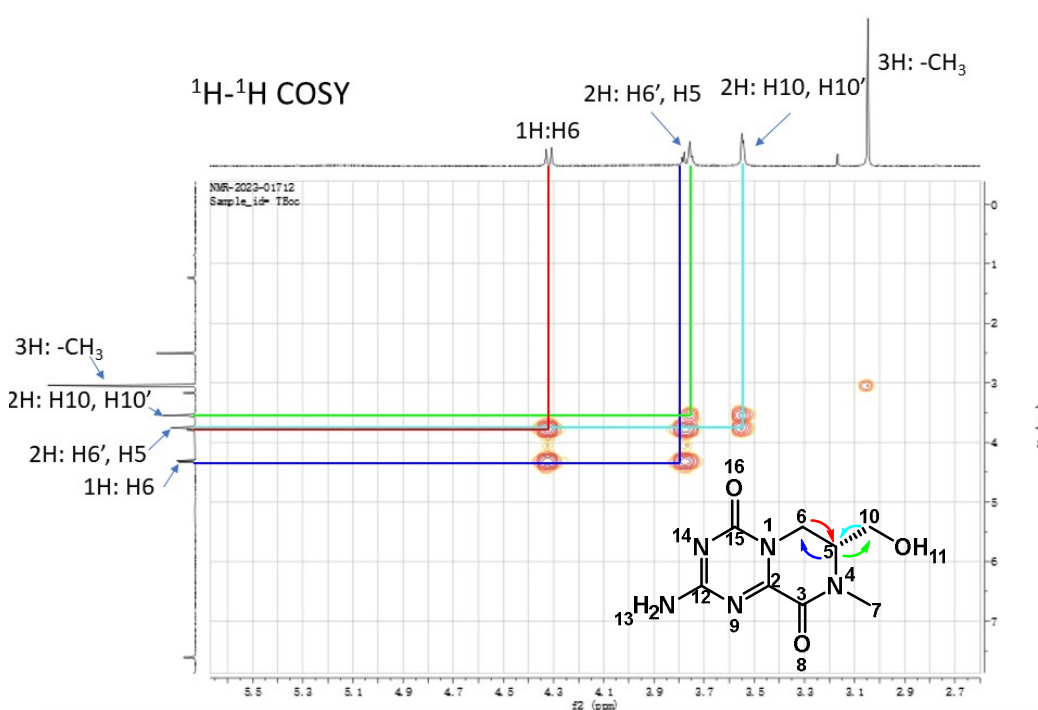

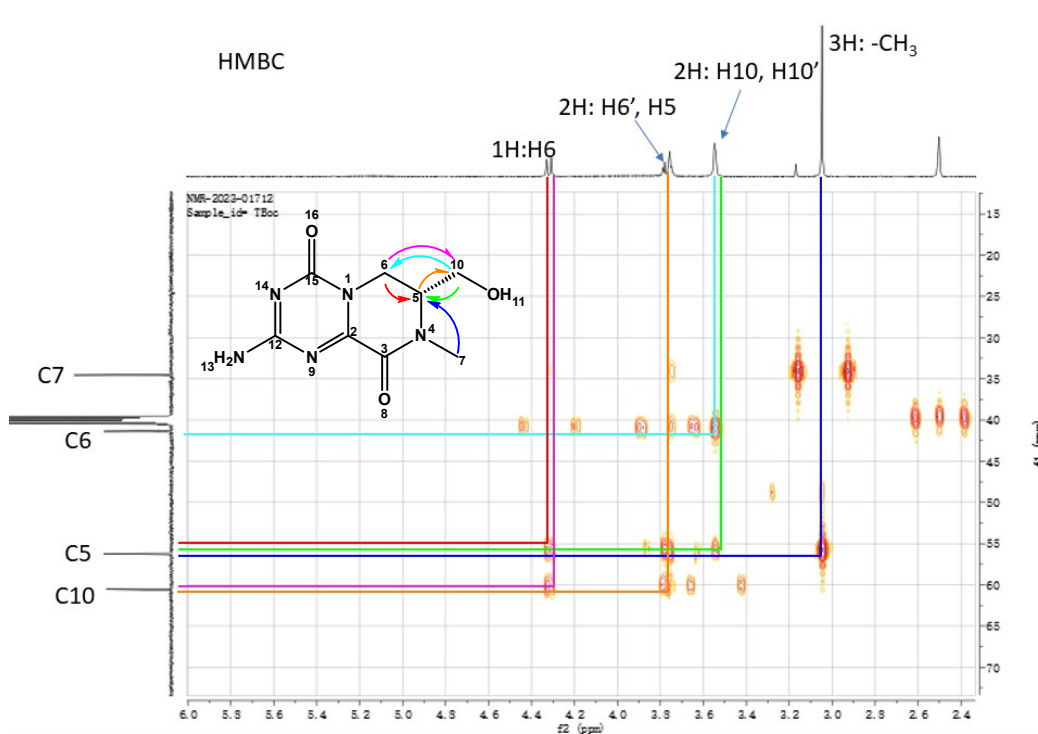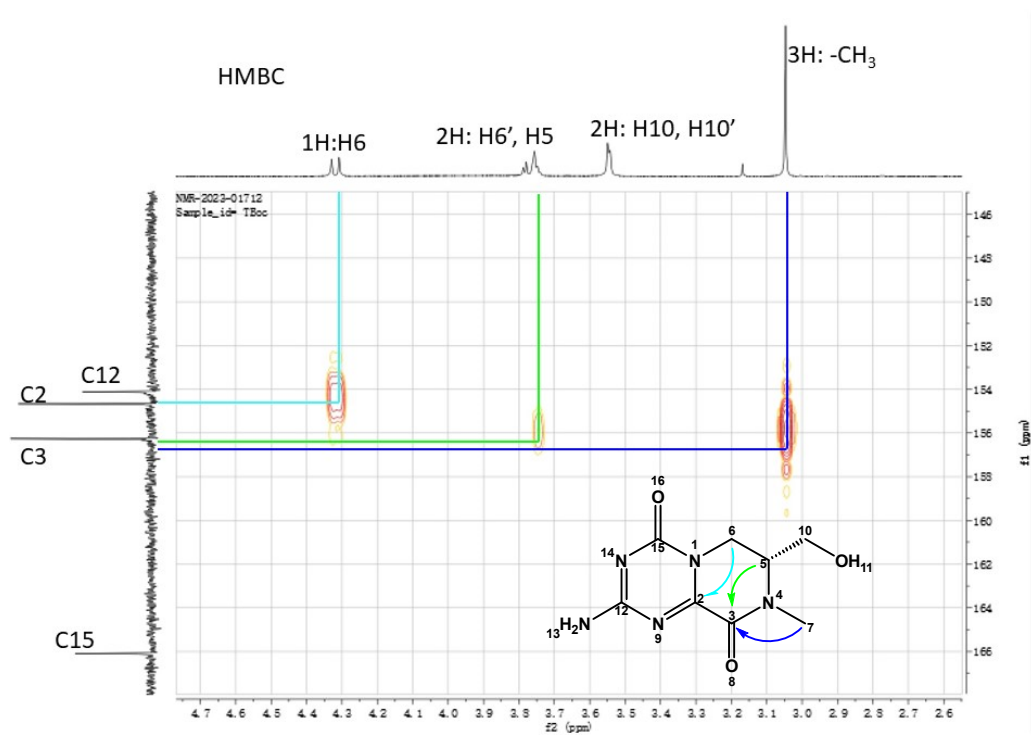

Supplement: s1 [file s1]
